# Supplementary material for: Evaluation of Physiological State of Pen Shell Pinna nobilis (Linnaeus, 1758) by a Non-Invasive Heart Rate Recording under Short-Term Hyposalinity Test
Source: MDPI journal article supplement (doi:10.3390/mi13091549), 2022-09-18
Supplement: s1 [file s1]

Supplementary files:

# Evaluation of Physiological State of Pen Shell *Pinna nobilis* (Linnaeus, 1758) by a Non-Invasive Heart Rate Recording under Short-Term Hyposalinity Test

Rajko Martinović, Danijela Joksimović, José Rafael García-March, Nardo Vicente and Zoran Gačić

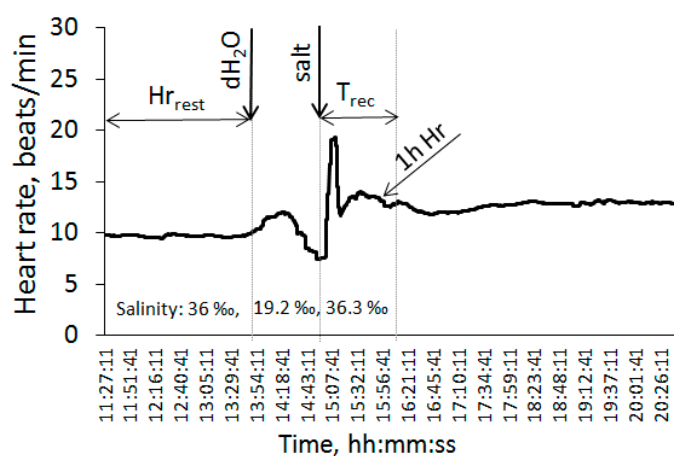

**Figure S1.** Example of the heart rate pattern of pen shell *P. nobilis* in clean sea water ( $Hr_{rest}$ ), during  $\approx 1$  h of 50 % salinity reduction by distilled water ( $dH_2O$ ) and after salt addition. Abbreviations:  $T_{rec}$  – heart rate recovery time.

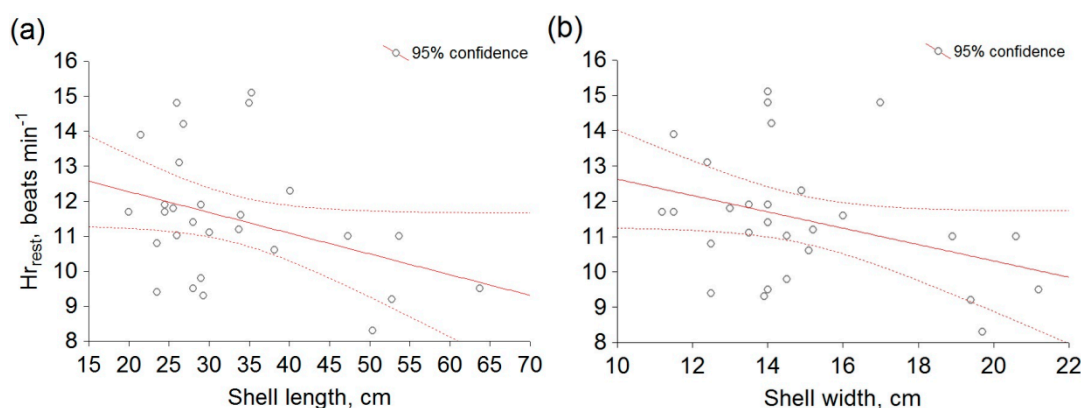

**Figure S2.** Relation between resting heart rate ( $Hr_{rest}$ ) and antero-posterior (a) shell length, (b) shell width of *P. nobilis*. Circles represent mean values obtained in six independent experiments.
